# Supplementary material
Source: HighWire-hosted journal article supplement (http://erj.ersjournals.com/highwire/filestream/114547/field_highwire_adjunct_files/0/ERJ-02278-2014_Table_S1.pdf)
Supplement: ERJ-02278-2014_Table_S1.pdf [file ERJ-02278-2014_Table_S1.pdf]

Table S1: Cumulative incidence by sex using different asthma incidence definitions

| <u>Definition</u> | <u>Asthma Incidence</u> |            |             |            |               |            |
|-------------------|-------------------------|------------|-------------|------------|---------------|------------|
|                   | <u>Overall</u>          |            | <u>Male</u> |            | <u>Female</u> |            |
|                   | <u>(n)</u>              | <u>(%)</u> | <u>(n)</u>  | <u>(%)</u> | <u>(n)</u>    | <u>(%)</u> |
| Definition 1*     | 326/5128                | 6.4        | 128/2500    | 5.1        | 198/2628      | 7.5        |
| Definition 2**    | 292/5056                | 5.8        | 110/2464    | 4.5        | 182/2592      | 7.0        |
| Definition 3a***  | 296/5009                | 5.9        | 120/2459    | 4.9        | 176/2550      | 6.9        |
| Definition 3b**** | 250/4789                | 5.2        | 95/2342     | 4.1        | 155/2447      | 6.3        |
| Definition 4***** | 298/4789                | 6.2        | 121/2342    | 5.2        | 177/2447      | 7.2        |
| Definition 5***** | 220/4932                | 4.5        | 86/2412     | 3.6        | 134/2520      | 5.3        |

\*Definition 1: cumulative incidence of doctor-diagnosed asthma from SAPALDIA1-3

\*\*Definition 2: definition 1, additionally adjusting for baseline self-report and close indicators of asthma

\*\*\*Definition 3a: definition 2, additionally adjusting for asthma symptoms

\*\*\*\*Definition 3b: combination of definition 2 and 3a, additionally excluding at baseline anyone reporting shortness of breath or wheeze ever

\*\*\*\*\*Definition 4: using asthma incidence definition from Jacquemin et al. (2014) which corresponds to definition 3b except the outcome is based on self-report and may reflect undiagnosed asthma [40]

\*\*\*\*\*Definition 5: definition 1, additionally excluding those reporting year of asthma onset at or before baseline
